# Supplementary material
Source: PubMed Central journal article supplement (PMC4638219)
Supplement: NIHMS715768-supplement-Supplemental_Table_I.pdf [file NIHMS715768-supplement-Supplemental_Table_I.pdf]

**Supplementary information S1: Mouse mononuclear phagocytes**

| <i>Surface Phenotype</i> | Adult HSC-derived DCs |                                            |                                                      | Adult HSC-derived                          | Embryonic-derived macrophages              |                              |
|--------------------------|-----------------------|--------------------------------------------|------------------------------------------------------|--------------------------------------------|--------------------------------------------|------------------------------|
|                          | pDC                   | cDC1                                       | cDC2                                                 | Monocyte-derived cell                      | Other macrophages                          | Langerhans cells             |
| MHC II                   | +                     | ++                                         | ++                                                   | +/-                                        | +/-                                        | ++                           |
| CD11c                    | +                     | ++                                         | ++                                                   | +/-                                        | +/-                                        | +                            |
| CD205                    | -                     | +                                          | +/-<br><i>unactivated</i><br>+ <i>activated</i>      | -                                          | -                                          | +                            |
| BST2/CD317               | +                     | - <i>unactivated</i><br>+ <i>activated</i> | - <i>unactivated</i><br>+ <i>activated</i>           | - <i>unactivated</i><br>+ <i>activated</i> | - <i>unactivated</i><br>+ <i>activated</i> | ?                            |
| LY6C                     | +                     | -                                          | -                                                    | +                                          | +/-                                        | -                            |
| B220                     | +                     | -                                          | -                                                    | -                                          | -                                          | -                            |
| Siglec H                 | +                     | -                                          | -                                                    | -                                          | +/-                                        | -                            |
| CD45RA                   | +                     | -                                          | -                                                    | -                                          | ?                                          | ?                            |
| BTLA                     | -                     | ++                                         | +                                                    | ?                                          | -                                          | -                            |
| c-Kit/CD117              | -                     | +                                          | +                                                    | ?                                          | -                                          | -                            |
| Clec9A                   | +                     | ++                                         | -                                                    | -                                          | -                                          | -                            |
| XCR1                     | -                     | +                                          | -                                                    | -                                          | -                                          | -                            |
| CD8a                     | +/-                   | +                                          | -                                                    | -                                          | -                                          | -                            |
| CD103                    | -                     | +                                          | +/-                                                  | -                                          | -                                          | -                            |
| CX3CR1                   | -                     | -                                          | +                                                    | ?                                          | +/-                                        | -                            |
| CD172a                   | low                   | -                                          | +                                                    | +                                          | +                                          | +                            |
| CD11b                    | -                     | -                                          | +                                                    | +                                          | +                                          | + epidermis<br>- lymph nodes |
| MR/CD206                 | -                     | -                                          | - <i>lymphoid organ resident</i><br>+ <i>tissues</i> | +                                          | +                                          | -                            |
| CD14                     | -                     | -                                          | -                                                    | +                                          | ++                                         | -                            |
| CD16                     | -                     | -                                          | -                                                    | +                                          | +                                          | -                            |
| MerTK                    | -                     | -                                          | -                                                    | +/-                                        | +                                          | -                            |
| Siglec F                 | -                     | -                                          | -                                                    | ?                                          | +                                          | -                            |
| FcεRI                    | -                     | -                                          | -                                                    | +/-                                        | -                                          | -                            |
| CD64                     | -                     | -                                          | -                                                    | +                                          | +                                          | ?                            |
| MCSF-R/CD115             | -                     | -                                          | +/-                                                  | +                                          | +                                          | +                            |
| Flt3                     | +                     | +                                          | +                                                    | ?                                          | -                                          | -                            |
| Langerin/CD207           | -                     | +                                          | -                                                    | -                                          | -                                          | ++                           |
| EpCAM/CD326              | -                     | +/-                                        | -                                                    | -                                          | +/-                                        | +                            |
| E-cadherin               | -                     | -                                          | -                                                    | -                                          | -                                          | +                            |

+/- = heterogenous expression or depending from tissue to tissue

? = not reported or unclear
