# Supplementary material
Source: PubMed Central journal article supplement (PMC4638219)
Supplement: NIHMS715768-supplement-Supplementary_Table_II.pdf [file NIHMS715768-supplement-Supplementary_Table_II.pdf]

**Supplementary information S2: Human mononuclear phagocytes**

| <i>Surface Phenotype</i> | Adult HSC-derived DCs |                     |                                      | Adult HSC-derived      | Embryonic-derived macrophages |                                 |
|--------------------------|-----------------------|---------------------|--------------------------------------|------------------------|-------------------------------|---------------------------------|
|                          | pDC                   | cDC1                | cDC2                                 | Monocyte-derived cells | Other macrophag               | Langerhans cells                |
| HLA-DR                   | +                     | +                   | +                                    | +                      | +                             | +                               |
| CD11c                    | -                     | low blood + tissues | ++                                   | ++                     | +/-                           | +                               |
| CD123                    | +                     | -                   | -                                    | -                      | -                             | -                               |
| BDCA2/CD303              | +                     | -                   | -                                    | -                      | -                             | -                               |
| BDCA4/CD304              | +                     | -                   | -                                    | ?                      | ?                             | -                               |
| Clec9A                   | -                     | +                   | -                                    | -                      | -                             | -                               |
| BDCA3/CD141              | -                     | ++                  | low unactivated + activated          | +                      | ?                             | -                               |
| XCR1                     | -                     | +                   | -                                    | -                      | -                             | -                               |
| CX3CR1                   | -                     | -                   | + blood + tissues                    | ++                     | -                             | +                               |
| /CD1c                    | -                     | -                   | +                                    | - blood +/- tissues    | ?                             | +                               |
| CD172a                   | -                     | -                   | +                                    | +                      | +                             | +                               |
| CD11b                    | -                     | -                   | + blood +/- tissues                  | +                      | +                             | +                               |
| MR/CD206                 | -                     | -                   | - blood, lymphoid organs +/- tissues | +                      | +                             | -                               |
| CD14                     | -                     | -                   | -                                    | ++                     | ++                            | -                               |
| CD16                     | -                     | -                   | -                                    | +/-                    | +/-                           | -                               |
| FceRI                    | -                     | -                   | + blood - tissues                    | +/-                    | -                             | - steady-state +/- inflammation |
| CD1a                     | -                     | -                   | - blood, lymphoid organs +/-         | +/-                    | -                             | ++                              |
| CD64                     | -                     | -                   | -/low                                | +                      | ?                             | ?                               |
| MCSF-R/CD115             | -                     | -                   | +/-                                  | +                      | +                             | +                               |
| Flt3                     | +                     | +                   | +                                    | +/-                    | ?                             | -                               |
| Langerin                 | -                     | -                   | -                                    | -                      | -                             | +                               |
| EpCAM/CD326              | -                     | -                   | -                                    | -                      | ?                             | +                               |
| E-cadherin               | -                     | -                   | -                                    | -                      | -                             | +                               |
| <b>Expression</b>        |                       |                     |                                      |                        |                               |                                 |
| zbtb46                   | -                     | +                   | +                                    | +/-                    | -                             | ?                               |
| E2-2                     | +                     | -                   | -                                    | -                      | -                             | -                               |
| TLR3                     | -                     | +                   | low                                  | -                      | ?                             | ?                               |
| Necl2                    | -                     | +                   | -                                    | ?                      | ?                             | ?                               |

+/- = heterogenous expression or depending from tissue to tissue  
 ? = not reported or unclear
